# Supplementary material for: Mixture of Anthraquinone Sulfo-Derivatives as an Inexpensive Organic Flow Battery Negolyte: Optimization of Battery Cell
Source: MDPI journal article supplement (doi:10.3390/membranes12100912), 2022-09-21
Supplement: s1 [file s1]

## Supplementary Information

**Table S1.** Main characteristics of redox behavior obtained by CV.

| Substance    | Scan rate<br>(mV s <sup>-1</sup> ) | Peak-to-peak separation <sup>a</sup> ,<br>dE (mV) | Half-wave potential <sup>b</sup> ,<br>E <sub>1/2</sub> (V) | Peak current ratio <sup>c</sup> , I <sub>c</sub> /I <sub>a</sub> |
|--------------|------------------------------------|---------------------------------------------------|------------------------------------------------------------|------------------------------------------------------------------|
| ASM          | 50                                 | 54                                                | 0.018                                                      | 0.85                                                             |
|              | 100                                | 59                                                | 0.017                                                      | 0.83                                                             |
|              | 250                                | 73 <sup>d</sup>                                   | 0.011                                                      | 0.84                                                             |
|              | 500                                | 98                                                | 0.005                                                      | 0.86                                                             |
|              | 1000                               | 103                                               | 0.005                                                      | 0.90                                                             |
| 2,7-<br>AQDS | 50                                 | 32                                                | 0.019                                                      | 0.95                                                             |
|              | 100                                | 36                                                | 0.019                                                      | 0.94                                                             |
|              | 250                                | 36                                                | 0.017                                                      | 0.97                                                             |
|              | 500                                | 29                                                | 0.013                                                      | 1.01                                                             |
|              | 1000                               | 27                                                | 0.012                                                      | 1.03                                                             |
| 2,6-<br>AQDS | 50                                 | 26                                                | 0.022                                                      | 0.95                                                             |
|              | 100                                | 27                                                | 0.022                                                      | 0.94                                                             |
|              | 250                                | 21                                                | 0.021                                                      | 0.97                                                             |
|              | 500                                | 20                                                | 0.019                                                      | 1.01                                                             |
|              | 1000                               | 23                                                | 0.012                                                      | 1.03                                                             |
| 2-AQS        | 50                                 | 24                                                | -0.027                                                     | 1.06                                                             |
|              | 100                                | 28                                                | -0.027                                                     | 1.02                                                             |
|              | 250                                | 23                                                | -0.030                                                     | 0.99                                                             |
|              | 500                                | 23                                                | -0.032                                                     | 1.00                                                             |
|              | 1000                               | 27                                                | -0.031                                                     | 0.94                                                             |

<sup>a</sup> dE = E<sub>a</sub> – E<sub>c</sub>, where E<sub>a</sub>/E<sub>c</sub> – anodic/cathodic peak potentials

$$^b E_{1/2} = \frac{E_a + E_c}{2}$$

<sup>c</sup> where I<sub>a</sub>/I<sub>c</sub> – anodic/cathodic peak current

<sup>d</sup> ASM anodic wave for scan rates over 50 mV s<sup>-1</sup> was treated as a single peak

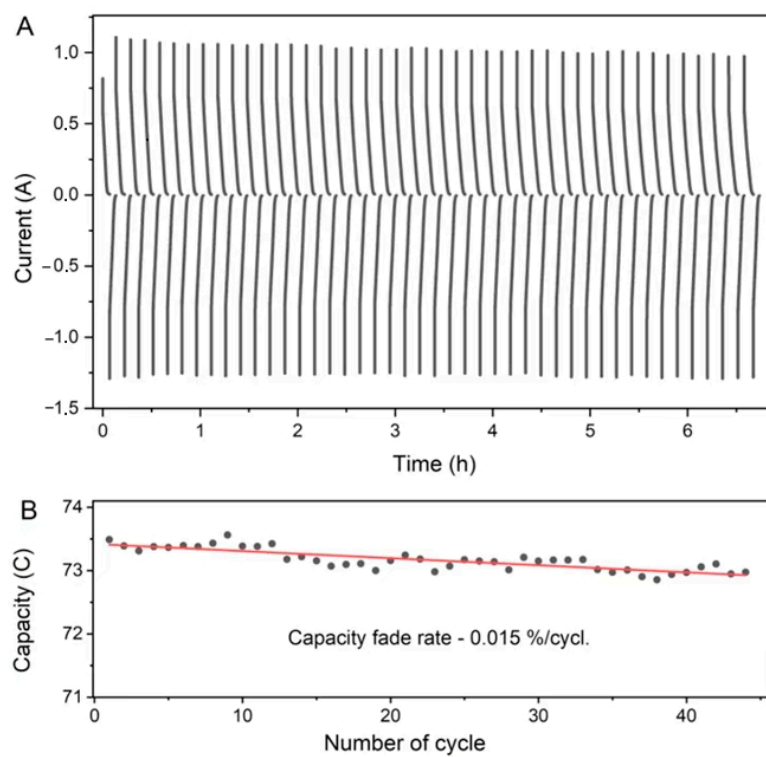

Figure S1. (A) Charge-discharge curves for constant current symmetrical cycling of ASM. Applied voltage – 0.2. (B) Dependence of the discharge capacity on the cycle number
